# Supplementary material for: Comparison of the chemical composition and antioxidant, anti-inflammatory, α-amylase and α-glycosidase inhibitory activities of the supernatant and cream from black tea infusion
Source: Royal Society of Chemistry journal article supplement (doi:10.1039/d2fo00707j), 2022-01-01
Supplement: d2fo00707j1.pdf [file d2fo00707j1.pdf]

**Table S1:** The information of m/z, retention time ( $t_R$ ) and collision energies (CE) by UPLC-Q-TOF-MS<sup>n</sup>

| $t_R$ (min) | m/z     | CE (mV) |
|-------------|---------|---------|
| 0.611       | 191.057 | 30.0    |
| 1.75        | 169.016 | 20.0    |
| 7.71        | 337.095 | 10.0    |
| 10.68       | 441.085 | 15.0    |
| 10.08       | 913.148 | 25.0    |
| 11.27       | 755.205 | 40.0    |
| 9.05        | 457.078 | 10.0    |
| 15.05       | 867.142 | 40.0    |
| 10.81       | 755.205 | 40.0    |
| 10.13       | 885.152 | 40.0    |
| 1.75        | 125.026 | 25.0    |
| 10.68       | 504.078 | 10.0    |
| 9.46        | 635.088 | 40.0    |
| 10.68       | 883.173 | 15.0    |
| 0.58        | 503.161 | 10.0    |
| 0.96        | 96.9611 | 30.0    |
| 2.36        | 343.068 | 10.0    |
| 6.89        | 337.094 | 10.0    |
| 5.82        | 337.094 | 10.0    |
| 7.71        | 173.047 | 20.0    |
| 10.59       | 771.199 | 45.0    |
| 14.32       | 715.13  | 35.0    |
| 7.716       | 422.072 | 20.0    |
| 7.428       | 289.073 | 20.0    |
| 11.97       | 425.088 | 15.0    |
| 5.34        | 337.094 | 10.0    |
| 7.71        | 697.174 | 30.0    |
| 10.26       | 771.199 | 45.0    |
| 8.01        | 761.135 | 30.0    |
| 0.55        | 311.100 | 20.0    |
| 0.58        | 173.094 | 20.0    |
| 5.89        | 305.068 | 20.0    |
| 11.24       | 740.493 | 30.0    |
| 11.74       | 593.151 | 40.0    |
| 2.36        | 191.057 | 25.0    |
| 10.81       | 818.199 | 10.0    |
| 10.50       | 301.000 | 40.0    |
| 0.58        | 134.049 | 32.0    |
| 8.48        | 337.094 | 10.0    |
| 11.93       | 853.577 | 30.0    |
| 8.83        | 563.142 | 40.0    |
| 2.36        | 365.049 | 35.0    |
| 11.27       | 818.199 | 10.0    |
